# Supplementary material for: Conserved and tissue-specific immune responses to biologic scaffold implantation
Source: PubMed Central journal article supplement (PMC10560402; doi:10.1101/2023.08.15.553390), 2023-08-17
Supplement: media-1.pdf [file media-1.pdf]

1 **SUPPLEMENTARY FIGURES AND LEGENDS**

2

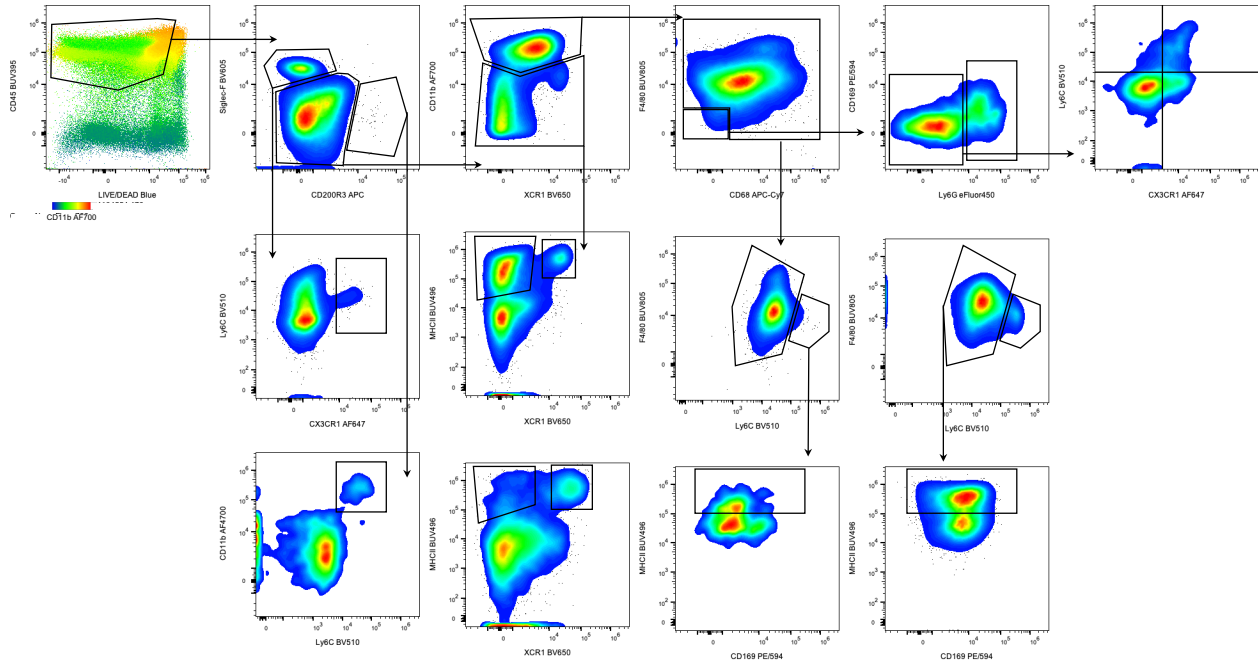

3

4

5 **SUPPLEMENTARY FIGURE 1 | Flow cytometry gating strategy for myeloid phenotyping.** Example  
6 gating is shown from intraperitoneal and volumetric muscle loss implant samples. FSC-A x SSC-A and  
7 FSC-A x FSC-H were used to discriminate debris and doublets before gating on live immune cells (FSC =  
8 forward scatter, SSC = side scatter, A = area, H = height). Modified from a preprinted manuscript [19].

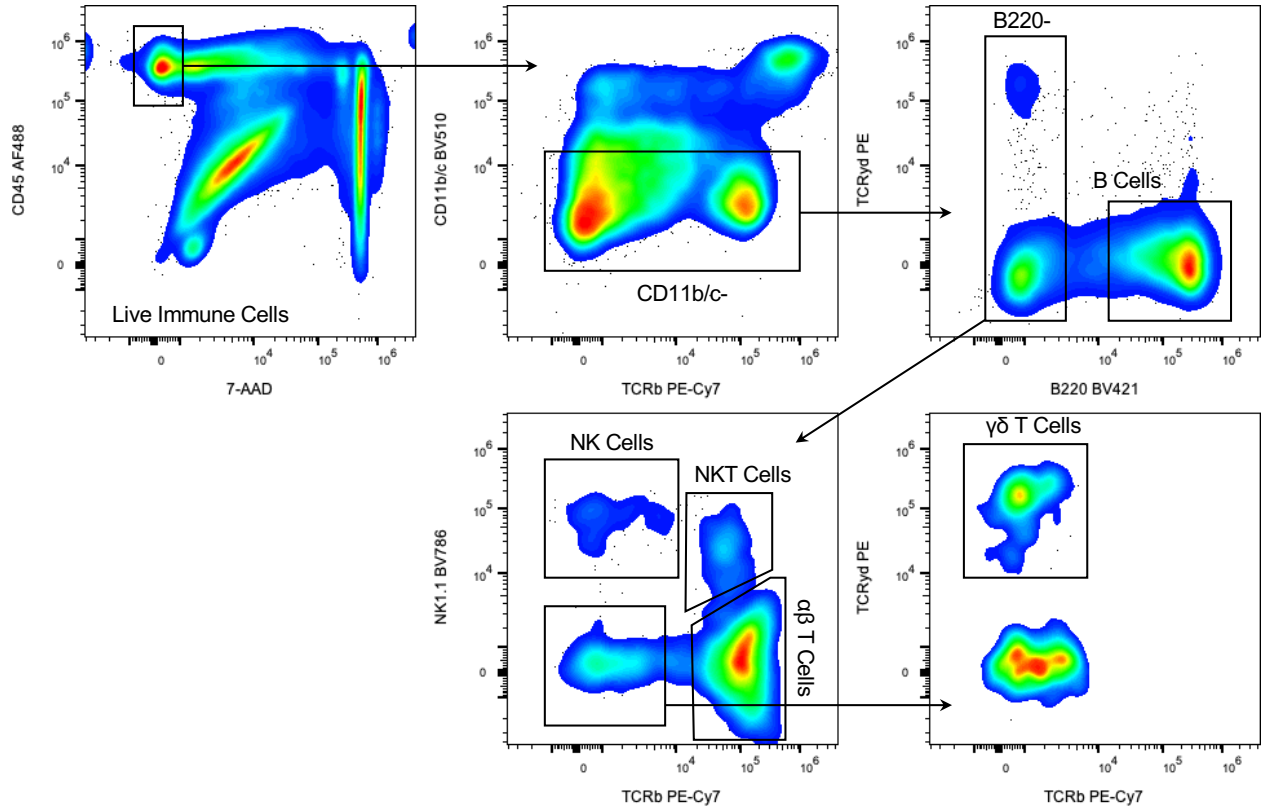

9

10

11 **SUPPLEMENTARY FIGURE 2 | Flow cytometry gating strategy for lymphoid phenotyping.** Example  
 12 gating shown from intraperitoneal implant sample. FSC-A x SSC-A and FSC-A x FSC-H were used to  
 13 discriminate debris and doublets before gating on live immune cells (FSC = forward scatter, SSC = side  
 14 scatter, A = area, H = height).

| Marker       | Target           | Clone    | Fluorophore     | Vendor    | Dilution Factor | Bead or Cell Control |
|--------------|------------------|----------|-----------------|-----------|-----------------|----------------------|
| CD45         | Leukocytes       | 30-F11   | BUV395          | BD        | 1:100           | PBMC                 |
| Viability    | Dead Cells       |          | LIVE DEAD Blue  | Thermo    | 1:1000          | RAW264.7             |
| MHCII        | APC              | 2G9      | BUV496          | BD        | 1:400           | PBMC                 |
| CD1d         | Lipid Ag Present | 1B1      | BUV563          | BD        | 1:200           | Beads                |
| F4/80        | Macrophage       | T45-2342 | BUV805          | BD        | 1:100           | Beads                |
| CD206        | M2 Mac           | C068C2   | BV421           | Biolegend | 1:100           | Beads                |
| Ly6G         | Neutrophil       | 1A8      | eFluor 450      | Thermo    | 1:200           | Beads                |
| CD103        | DC               | M290     | BV480           | BD        | 1:200           | Beads                |
| Ly6C         | Monocyte         | HK1.4    | BV510           | Biolegend | 1:200           | PBMC                 |
| CD11c        | DC               | N418     | BV570           | Biolegend | 1:200           | Beads                |
| Siglec-F     | Eosinophil       | E50-2440 | BV605           | BD        | 1:200           | Beads                |
| XCR1         | DC               | ZET      | BV650           | Biolegend | 1:400           | Beads                |
| CD11b        | Myeloid          | M1/70    | Alexa Fluor 700 | Biolegend | 1:400           | PBMC                 |
| CD8 $\alpha$ | DC               | 53-6.7   | Spark Blue 550  | Biolegend | 1:100           | PBMC                 |
| CD301b       | Macrophage       | URA-1    | PE/Cy7          | Biolegend | 1:400           | PBMC                 |
| CD86         | M1 Mac           | A17199A  | PE              | Biolegend | 1:400           | PBMC                 |
| CD169        | Tissue Resident  | 3D6.112  | PE/Dazzle594    | Biolegend | 1:400           | Beads                |
| CCR7         | M1 Mac           | 4B12     | PE-Cy5          | Biolegend | 1:200           | PBMC                 |
| CD200R3      | Baso/Mast Cell   | Ba13     | APC             | Biolegend | 1:200           | Beads                |
| CX3CR1       | Pre-M2           | SA011F11 | Alexa Fluor 647 | Biolegend | 1:400           | PBMC                 |
| CD68         | Macrophage       | FA-11    | APC-Cy7         | Biolegend | 1:100           | Beads                |

15

16

17 **SUPPLEMENTARY TABLE 1 | Flow cytometry antibodies for the myeloid phenotyping panel.** Modified

18 from a preprinted manuscript [19].

| Marker             | Target                 | Clone   | Fluorophore | Vendor | Dilution Factor | Bead or Cell Control |
|--------------------|------------------------|---------|-------------|--------|-----------------|----------------------|
| CD45               | Immune                 | I3/2.3  | AF488       | BD     | 1:100           | Beads                |
| Viability          | Dead Cells             |         | 7-AAD       | BD     | Neat            | PBMCs                |
| TCR $\gamma\delta$ | $\gamma\delta$ T Cells | GL-3    | PE          | BD     | 1:100           | Beads                |
| TCR $\beta$        | $\alpha\beta$ T cells  | H57-597 | PE/Cy7      | BD     | 1:100           | Beads                |
| B220               | B Cells                | RA3-6B2 | BV421       | BD     | 1:100           | Beads                |
| CD11b              | Myeloid                | M1/70   | BV510       | BD     | 1:100           | Beads                |
| CD11c              | Myeloid                | HL3     | BV510       | BD     | 1:100           | Beads                |
| NK1.1              | NK Cells               | PK136   | BV786       | BD     | 1:100           | Beads                |

19

20 **SUPPLEMENTARY TABLE 2 | Flow cytometry antibodies for a lymphoid phenotyping panel.**

21 Modified from a preprinted manuscript [19]
